# Supplementary material for: Enhancing Pigment Phenotyping and Classification in Lettuce through the Integration of Reflectance Spectroscopy and AI Algorithms
Source: MDPI journal article supplement (doi:10.3390/plants12061333), 2023-03-16
Supplement: s1 [file s1]

# Enhancing Pigment Phenotyping and Classification in Lettuce Through the Integration of Reflectance Spectroscopy and AI Algorithms

Renan Falcioni <sup>1,\*</sup>, João Vitor Ferreira Gonçalves <sup>1</sup>, Karym Mayara de Oliveira <sup>1</sup>, Caio Almeida de Oliveira <sup>1</sup>, José A. M. Demattê <sup>2</sup>, Werner Camargos Antunes <sup>1</sup> and Marcos Rafael Nanni <sup>1</sup>

<sup>1</sup> Graduate Program in Agronomy, Department of Agronomy, State University of Maringá, Av. Colombo, 5790, Maringá 87020-900, Paraná, Brazil

<sup>2</sup> Department of Soil Science, Luiz de Queiroz College of Agriculture, University of São Paulo, Av. Pádua Dias, 11, Piracicaba 13418-260, São Paulo, Brazil

\* Correspondence: renanfalcioni@gmail.com; Tel.: +55-44-3011-8940

**Table S1.** Descriptive analysis parameters of lettuce varieties. Pigment of leaves expressed by leaf area (mg m<sup>-2</sup>), mass (mg g<sup>-1</sup>), and volume (mL L<sup>-1</sup>). (*n* = 132).

| Parameters                   | Count (n) | Mean  | Median | Minimum | Maximum | CV (%) |
|------------------------------|-----------|-------|--------|---------|---------|--------|
| Chla (mg m <sup>-2</sup> )   | 132       | 128.3 | 118.3  | 63.1    | 306.4   | 39.2   |
| Chlb (mg m <sup>-2</sup> )   | 132       | 66.5  | 61.7   | 39.4    | 147.3   | 35.1   |
| Chla+b (mg m <sup>-2</sup> ) | 132       | 194.9 | 182.1  | 108.0   | 453.7   | 37.6   |
| Car (mg m <sup>-2</sup> )    | 132       | 45.5  | 42.3   | 25.6    | 101.9   | 35.5   |
| AnC (nmol cm <sup>-2</sup> ) | 132       | 13.1  | 11.4   | 0.0     | 68.6    | 125.8  |
| Flv (nmol cm <sup>-2</sup> ) | 132       | 58.4  | 49.0   | 0.0     | 178.3   | 62.2   |
| Chla (mg g <sup>-1</sup> )   | 132       | 14.8  | 14.3   | 8.2     | 31.4    | 26.4   |
| Chlb (mg g <sup>-1</sup> )   | 132       | 7.7   | 7.7    | 4.5     | 15.1    | 23.1   |
| Chla+b (mg g <sup>-1</sup> ) | 132       | 22.5  | 21.7   | 13.2    | 46.5    | 24.9   |
| Car (mg g <sup>-1</sup> )    | 132       | 5.3   | 5.1    | 3.2     | 10.9    | 24.2   |
| AnC (μmol g <sup>-1</sup> )  | 132       | 16.3  | 16.4   | 0.0     | 83.1    | 121.3  |
| Flv (μmol g <sup>-1</sup> )  | 132       | 74.2  | 71.0   | 12.7    | 203.8   | 60.1   |
| Phe (mL L <sup>-1</sup> )    | 132       | 62.8  | 66.3   | 42.7    | 78.7    | 16.6   |
| Chla/b ratio                 | 132       | 1.9   | 2.0    | 1.4     | 2.2     | 9.4    |
| Car/Chla+b ratio             | 132       | 0.2   | 0.2    | 0.2     | 0.3     | 6.1    |

**Table S2.** STEPW and VIPs by wavelengths selected according to classified algorithm-based ANOVA and information gain ratio (*p* < 0.001) by band range spectroscopy from reflectance leaves. Bold underlines show shared wavelengths between the STEPW and VIP.

| Band range<br>(nm) | N  | Shared | STEPWise selection wavelengths (nm)               | Most responsive VIP-rank selection wavelengths (nm)     |
|--------------------|----|--------|---------------------------------------------------|---------------------------------------------------------|
| 400-700            | 34 | 7      | 548, 570, 560, 581, 531, 700, 544, 540, 538, 615, | 549, 548, 550, 547, 551, 546, 552, 545, 544, 553, 543,  |
|                    |    |        | 545, 456, 491, 437, 434, 645, 654, 452, 429, 472, | 542, 554, 555, 559, 535, 560, 533, 573, 522, 524, 574,  |
| 700-1300           | 57 | 3      | 641, 609, 687, 658, 687, 658, 614, 626, 430, 594, | 570, 589, 599, 606, 608, 500, 497, 510, 700, 610, 693,  |
|                    |    |        | 441, 528, 527, 659, 427, 443                      | 491                                                     |
| 1300-2400          | 22 | 2      | 701, 737, 1034, 915, 703, 1274, 933, 975, 995,    | 986, 965, 960, 954, 958, 700, 711, 754, 757, 707, 766,  |
|                    |    |        | 924, 922, 954, 983, 970, 799, 923, 908 1021,      | 749, 762, 748, 767, 1057, 1156, 1295, 1151, 1149, 1445, |
| 400-2400           | 26 | 3      | 1027, 992, 911, 885, 798, 1088, 1001, 811, 842,   | 1169, 1173, 1284, 789, 1283, 1174, 1131, 1276, 795,     |
|                    |    |        | 857, 860, 805, 831, 829, 1033, 935, 832, 845,     | 1185, 797, 1115, 1266, 1108, 896, 814, 913, 1423, 1055, |
|                    |    |        | 879, 928, 801, 780, 787, 807, 986, 847, 994, 806, | 1299, 1047, 861, 1058, 1249, 1109, 743, 867, 1087,      |
|                    |    |        | 907, 846, 995, 810, 1003, 803, 859, 941, 918,     | 1244, 879, 745, 892, 740, 715, 768, 853                 |
|                    |    |        | 978, 874                                          |                                                         |
|                    |    |        | 2245, 1861, 2023, 1310, 1830, 1842, 2220, 1921,   | 2364, 2371, 2366, 2373, 2400, 2353, 1442, 1437, 1816,   |
|                    |    |        | 1803, 1806, 1841, 1816, 1941, 2277, 2295, 2296,   | 2350, 1836, 1842, 1460, 1887, 2013, 1385, 2324, 2088,   |
|                    |    |        | 1829, 1843, 2013, 1924, 1837, 1810                | 1416, 1789, 1658, 1781                                  |
|                    |    |        | 548, 570, 560, 581, 531, 701, 544, 540, 743,      | 548, 549, 550, 547, 551, 546, 560, 553, 572, 583, 2378, |
|                    |    |        | 1023, 952, 527, 1059, 741, 1539, 1754, 700, 942,  | 2373, 2367, 2382, 2326, 600, 2045, 2071, 1435, 1425,    |
|                    |    |        | 1009, 998, 1065, 562, 559, 1000, 574, 597         | 1993, 1446, 1840, 1940, 1539, 435                       |

Table S3. Description of artificial intelligence algorithms (AIAs).

| Algorithms | Abbreviation | Description | References |
|------------|--------------|-------------|------------|
|------------|--------------|-------------|------------|

|                             |         |                                                                                                                         |      |
|-----------------------------|---------|-------------------------------------------------------------------------------------------------------------------------|------|
| AdaBoost                    | AdB     | Boosting algorithm that combines weak learners to create a strong classifier.                                           | [41] |
| CN2 rule inducer            | CN2     | Decision tree algorithm that creates a set of if-then rules to classify data.                                           | [41] |
| Constant                    | Const   | Algorithm that always predicts the same class, regardless of input.                                                     | [41] |
| Gradient Boosting           | G-Boo   | Boosting algorithm that combines multiple decision trees to create a strong classifier.                                 | [41] |
| Kernel k Nearest Neighbours | KNN     | Non-parametric algorithm that classifies data based on the k closest training examples in a feature space.              | [41] |
| Logistic Regression         | Log-Reg | Parametric algorithm that models the probability of a binary outcome based on input features.                           | [41] |
| Naive Bayes                 | Nai-Bay | Probabilistic algorithm that models the likelihood of each class given the input features.                              | [41] |
| Neural Network              | NN      | Algorithm that models complex non-linear relationships between inputs and outputs using layers of interconnected nodes. | [41] |
| Stochastic Gradient Descent | SGD     | Optimization algorithm that minimizes the error of a model by adjusting the weights of the inputs.                      | [41] |
| Random Forest               | RF      | Ensemble learning algorithm that combines multiple decision trees to create a strong classifier.                        | [41] |
| Support Vector Machines     | SVM     | Algorithm that finds the hyperplane that best separates two classes in a feature space.                                 | [41] |
| Tree                        | Tree    | Decision tree algorithm that recursively partitions data based on input features.                                       | [41] |

\*\*\* references were based explication of models.

41. <https://orangedatamining.com/widget-catalog/> Orange Models.
